# Supplementary material
Source: PubMed Central journal article supplement (PMC5538303)
Supplement: rti-32-159-s003.pdf [file rti-32-159-s003.pdf]

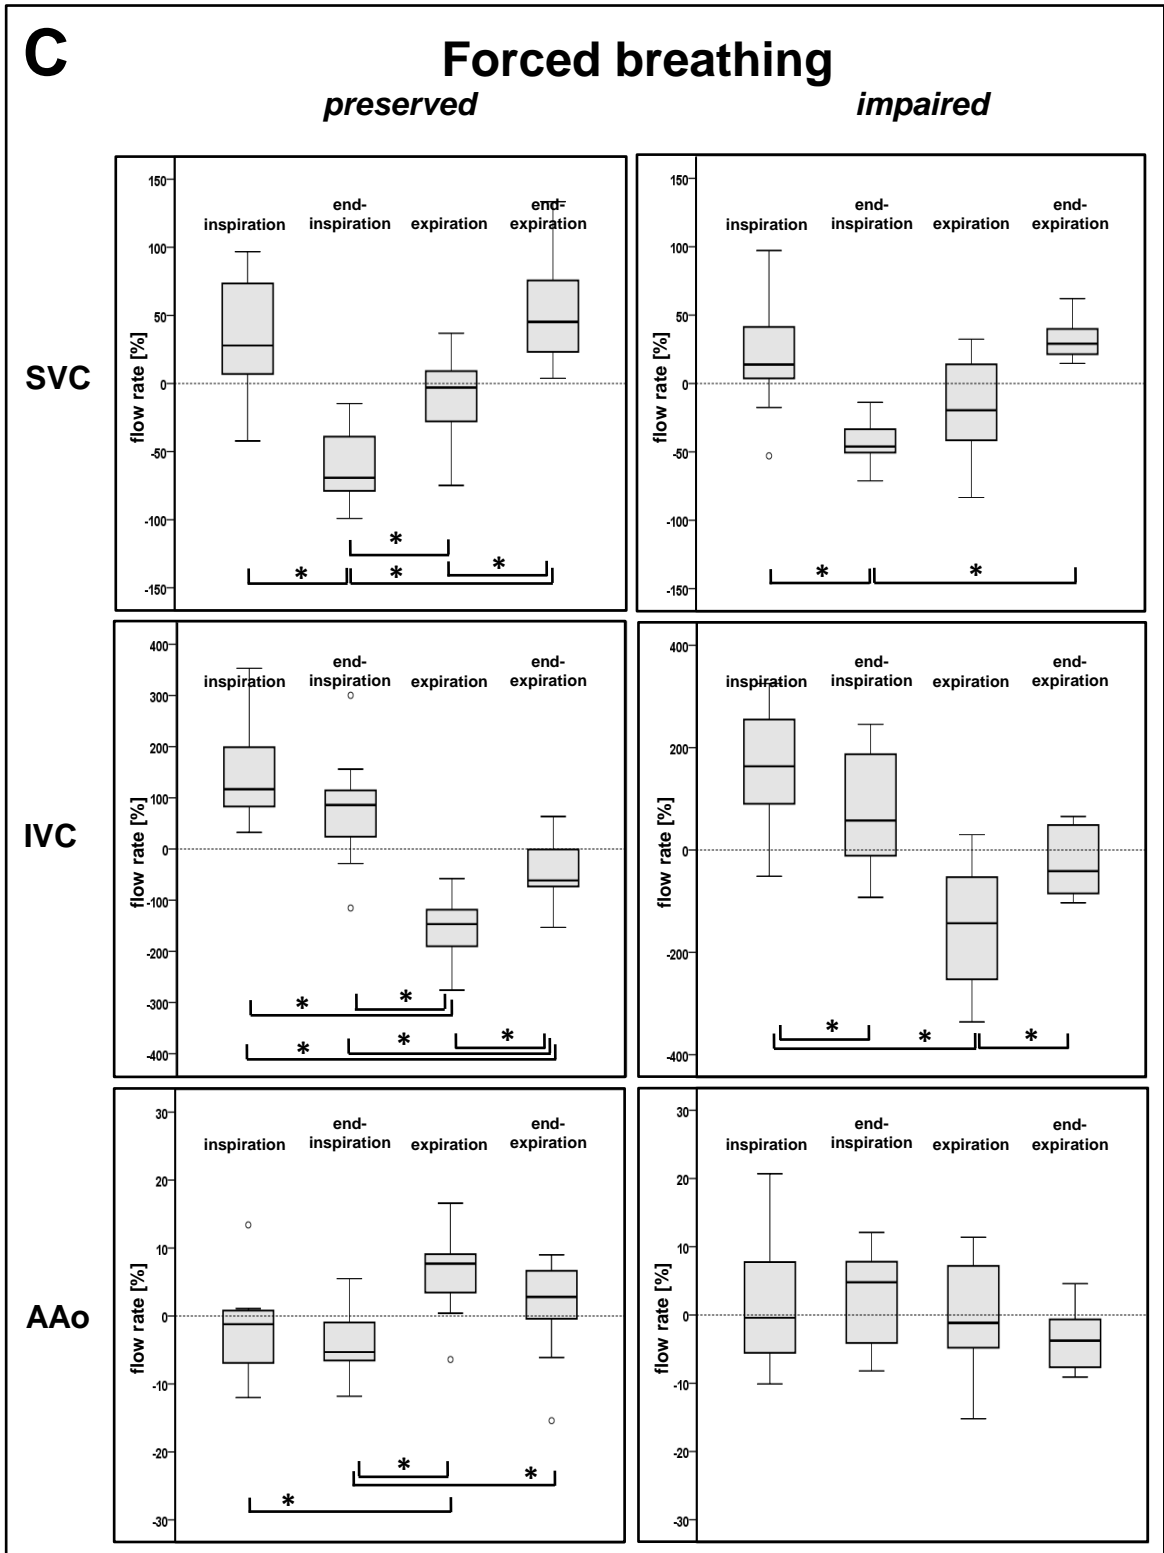

**SDC 2.** Box plots demonstrating the impact of breathing on respiration-dependent blood flow rates in patients with preserved and impaired hemodynamics. Superior vena cava (SVC), inferior vena cava (IVC) and ascending aorta (AAo). Percentage deviation from mean flow rate. Statistical significance ( $p < 0.05$ ) between respiratory phases are marked by an asterisk. (A) room-air, (B) with oxygen inhalation, (C) forced breathing
